# Supplementary material for: The p300/YY1/miR-500a-5p/HDAC2 signalling axis regulates cell proliferation in human colorectal cancer
Source: PubMed Central journal article supplement (PMC6368584; doi:10.1038/s41467-018-08225-3), 2019-02-08
Supplement: 41467_2018_8225_MOESM1_ESM.pdf [file 41467_2018_8225_MOESM1_ESM.pdf]

## **Supplementary Information**

**Title: The p300/YY1/miR-500a-5p/HDAC2 signalling axis regulates cell proliferation in human colorectal cancer**

Tang, W et al

Supplementary Fig 1

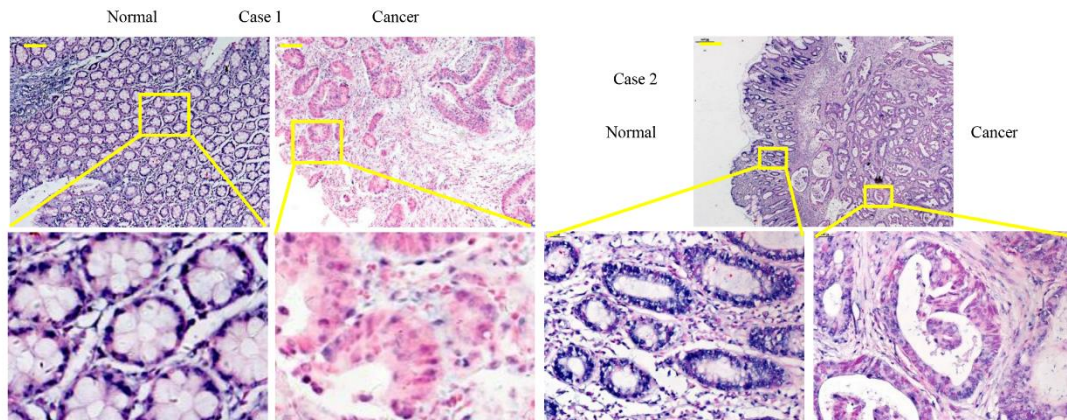

**Supplementary Fig. 1** MiR-500a-5p expression was detected in CRC and adjacent normal tissue by in situ hybridization (ISH). Scale bars, 50  $\mu$ m.

Supplementary Fig 2

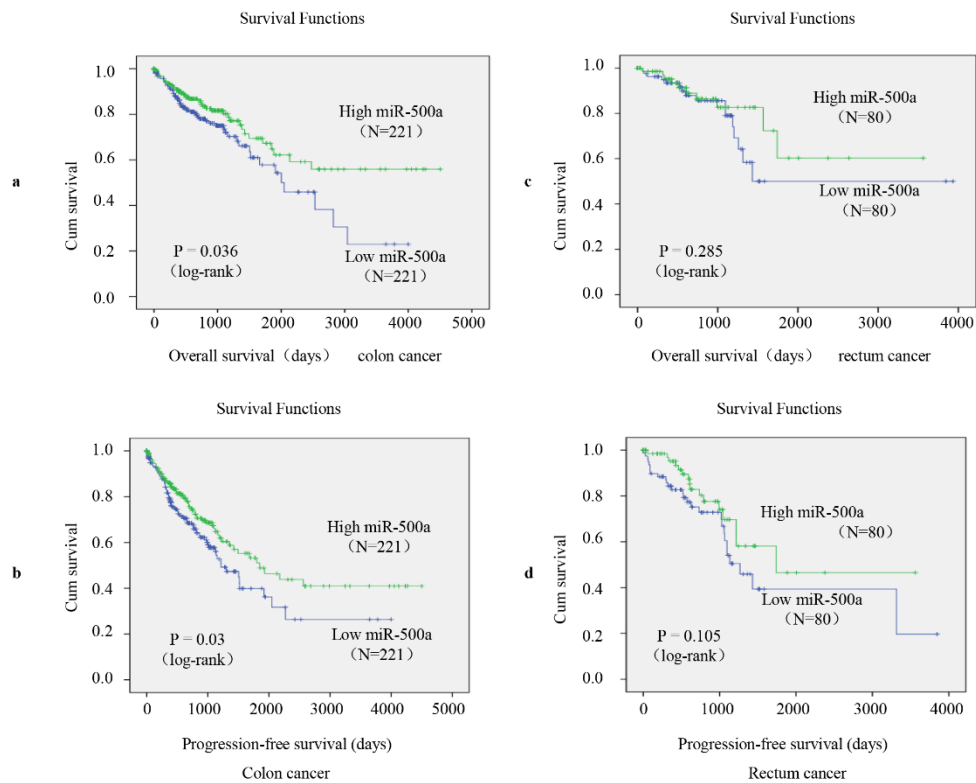

**Supplementary Fig. 2** Kaplan-Meier curves for overall survival (OS) (A and C) and progression-free survival (PFS) by (b and d) miR-500a-5p expression. Log-rank test.

Supplementary Fig 3

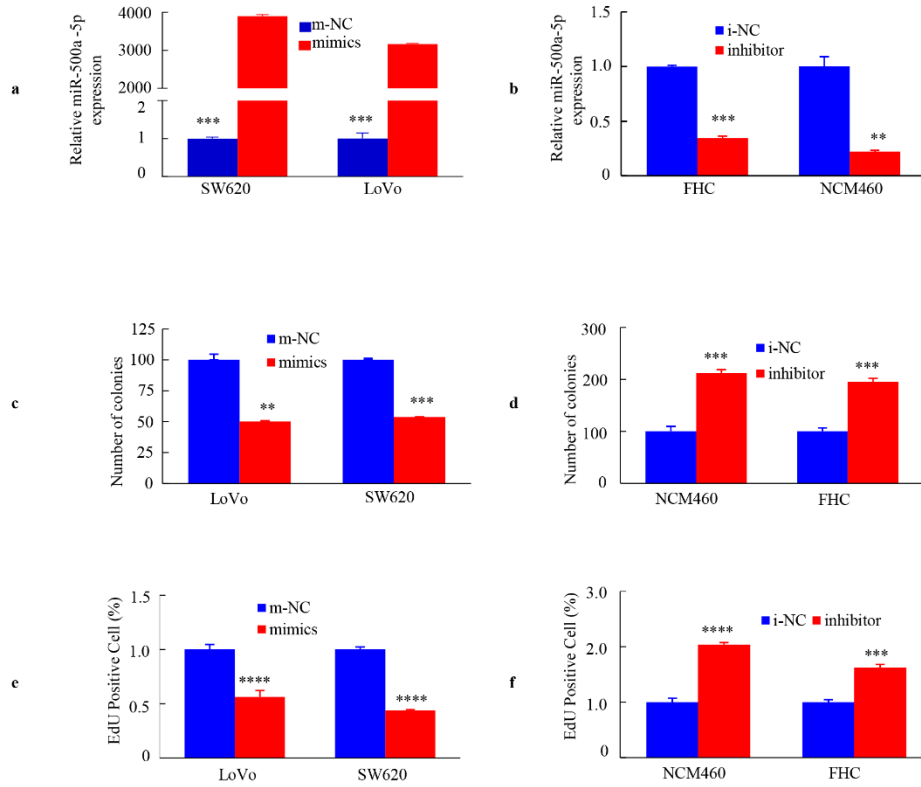

**Supplementary Fig. 3 The effect of miR-500a-5p in CRC cells on cell proliferation in vitro. (a) & (b)** MiR-500a-5p expression following transfection of colon epithelial cells, as confirmed by qRT-PCR. Student's t-test. \*\* P < 0.05; \*\*\* P < 0.01. **(c) & (d)** Effects of miR-500a-5p mimics or inhibitor on the proliferation of colon epithelial cells, as determined by colony formation assay. Student's t-test. \*\*P < 0.05 and \*\*\* P < 0.01. **(e) & (f)** DNA synthesis in colon epithelial cells was measured by the EdU incorporation assay. Student's t-test. \*\*\*\*P < 0.001, mimics vs. m-NC; and \*\*\* P < 0.01 and \*\*\*\*P < 0.001, inhibitor vs. i-NC. All results are expressed as the mean of three independent experiments  $\pm$ SD.

Supplementary Fig 4

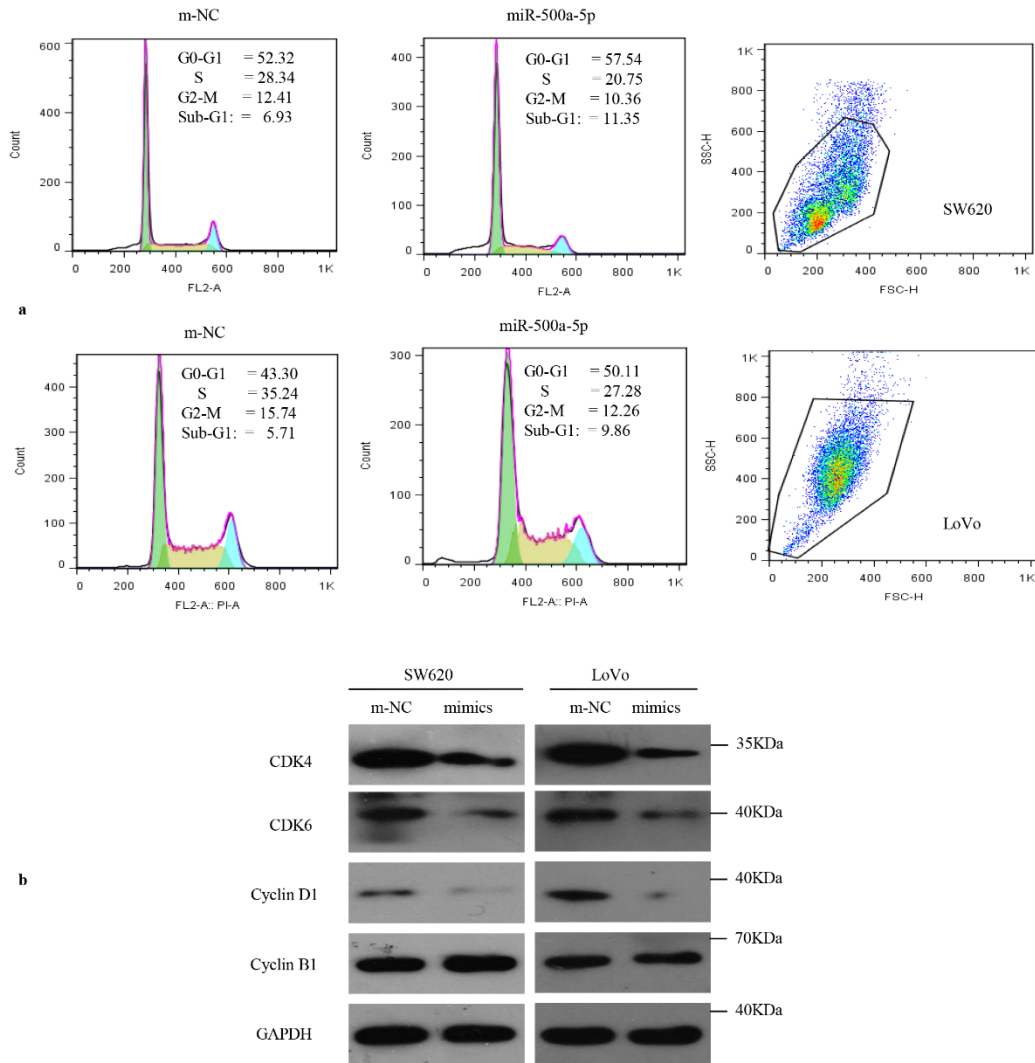

**Supplementary Fig. 4 The effect of miR-500a-5p on cell cycle progression of CRC cells. (a)** The effects of miR-500a-5p (mimics) or m-NC on the cell cycle distribution of CRC cells were determined by flow cytometry after staining with PI. The R1 gate is determined by forward-scatter area (FSC) and side-scatter area (SSC). **(b)** The expression of cell cycle related proteins was detected in CRC cells. These figures are representative of three independent experiments.

Supplementary Fig 5

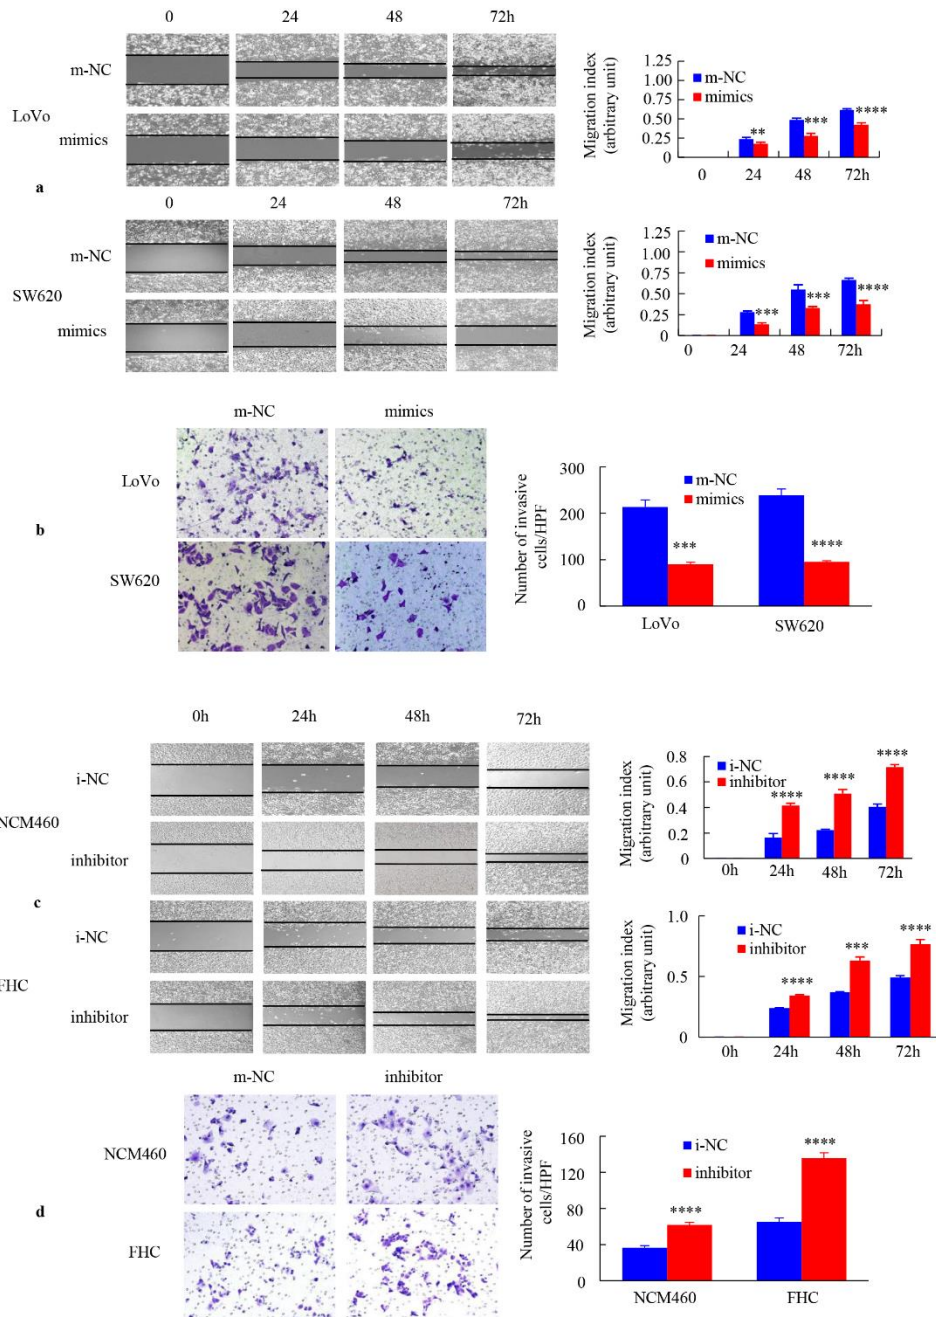

**Supplementary Fig. 5 The effect of miR-500a-5p on the metastatic and invasive capacity of colon epithelial cells. (a) & (c).** Cell migration activity was measured by the wound healing assay. Student's t-test. **\*\*** $P < 0.05$ ; **\*\*\***  $P < 0.01$ ; **\*\*\*\***  $P < 0.001$ . **(b) & (d).** Cell invasive activity was measured by the transwell assay. Student's t-test. **\*\*\***  $P < 0.01$ ; **\*\*\*\***  $P < 0.001$ . The experiments were repeated three times with similar results.

Supplementary Fig. 6

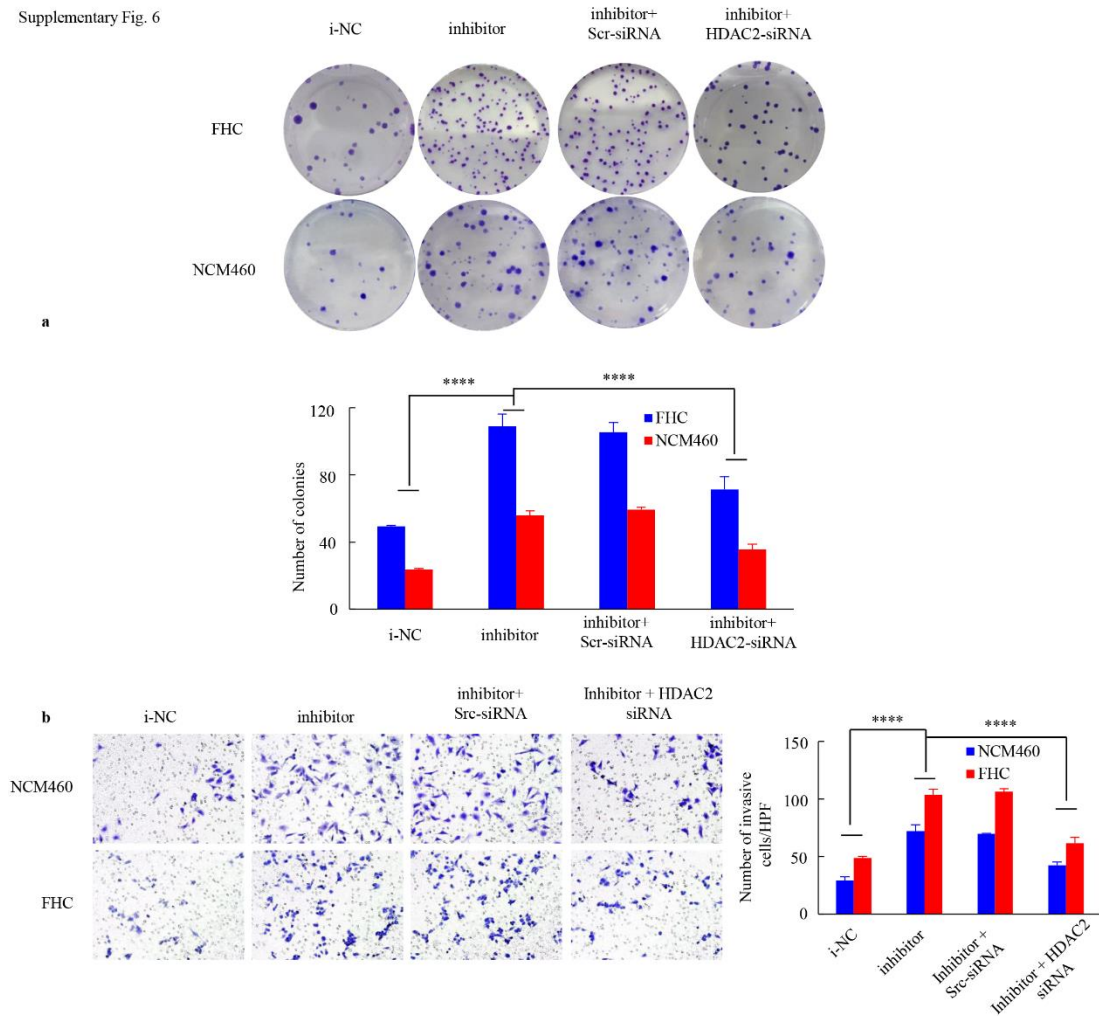

**Supplementary Fig. 6 HDAC2 is a direct downstream target of miR-500a-5p. (a)**

Representative results (up) and quantification (down) of crystal violet-stained cell colonies formed by the indicated colon epithelial cells lines at 12 days after seeding.

Student' s t-test .\*\*\*\* P < 0.001, i-NC vs. inhibitor and inhibitor plus scr (scrambled) siRNA or inhibitor plus HDAC2 siRNA, respectively. **(b)** The invasive activity of cells

transfected with i-NC, inhibitor, inhibitor plus src siRNA or inhibitor plus HDAC2 siRNA, respectively. Student' s t-test .\*\*\*\* P < 0.001, i-NC vs. inhibitor and inhibitor

plus scr siRNA or inhibitor plus HDAC2 siRNA, respectively. The experiments were repeated at least three times.

Supplementary Fig.  
7

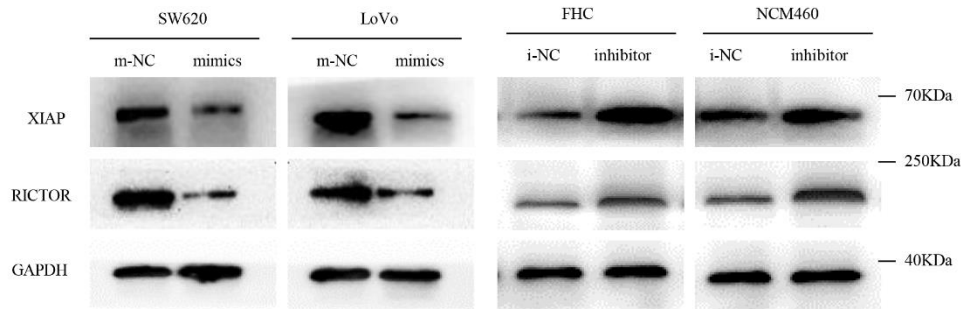

**Supplementary Fig. 7 MiR-500a-5p target XIAP or RICTOR in CRC cells.**

Western blot analysis of XIAP or RICTOR protein expression in SW620 and LoVo cells transfected with miR-500a-5p mimics. Transfected cells with an m-NC plasmid were used as controls. The experiments were repeated three times with the same results.

Supplementary Fig. 8

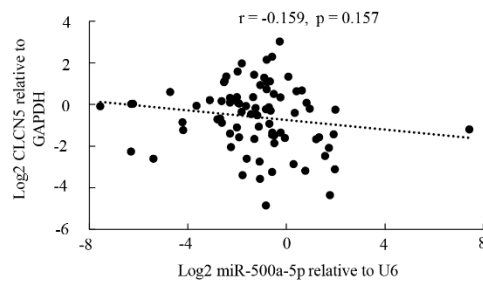

**Supplementary Fig. 8 The expression of *miR-500a-5p* and host genes *CLCN5* in**

**CRC tissues.** MiR-500a-5p expression uncorrelated with CLCN5 expression in 81 CRC tissues by q-PCR. Linear regression analysis,  $r = -0.159$  \*  $P = 0.157$ . All of these experiments were repeated three times with identical findings.

Supplementary Fig. 9

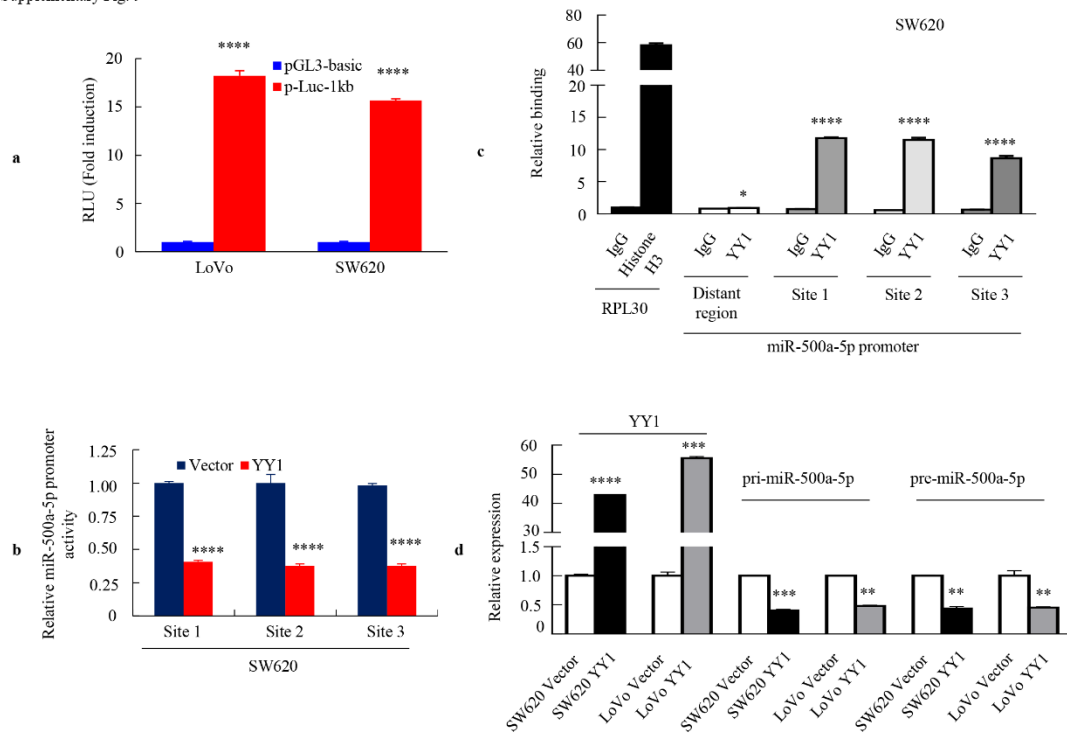

**Supplementary Fig. 9 miR-500a-5p is regulated directly by the transcription**

**factor YY1. (a)** The CRC cells were transiently transfected with pGL3 basic plasmid,

or the p-Luc-1kb vector of the putative promoter region of miR-500a-5p upstream of

the luciferase reporter plasmid for 48 h. Promoter activity was presented as the fold

induction of RLU as compared with pGL3 basic plasmid. RLU = values of firefly

luciferase unit/values of *Renilla* luciferase unit. This result is expressed as the mean of

three independent experiments  $\pm$ S.D. Student's t-test . \*\*\*\*P<0.001. **(b)** Luciferase

activity of the miR-500a-5p promoter construct after transfection of YY1 or vector

plasmid in SW620 cells. Student's t-test. \*\*\*\*P < 0.001. **(c)** A ChIP-qPCR assay

demonstrated the direct binding of YY1 to the miR-500a-5p promoter in SW620 cells.

Fold changes are normalized to the IgG. Student's t-test. \*P > 0.05; \*\*\*\*P < 0.001. **(d)**

Expression of YY1, primary (pri-) and precursors (pre-) miR-500a-5p in YY1-



overexpressing CRC cells measured by q-PCR. Data was normalized to vector.

Student's t-test. \*\*  $P < 0.05$ ; \*\*\* $P < 0.01$ ; \*\*\*\* $P < 0.001$ . These figures are representative of three independent experiments.

Supplementary Fig  
10

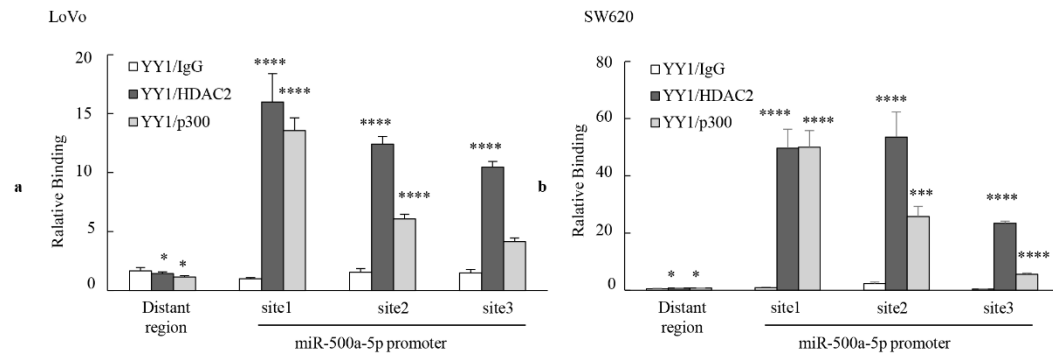

**Supplementary Fig. 10 YY1-HDAC2 or YY1-p300 interaction on miR-500a-5p**

**promoter in re-ChIP.** Chromatin was precipitated with anti-YY1 antibody, and re-precipitated with anti-HDAC2 or p300 antibody or IgG, followed by q-PCR in LoVo (A) or SW620 (B) cells. Student's t-test. \* $P > 0.05$ ; \*\*\* $P < 0.01$ ; \*\*\*\* $P < 0.001$ . All of these experiments were repeated three times with identical findings.

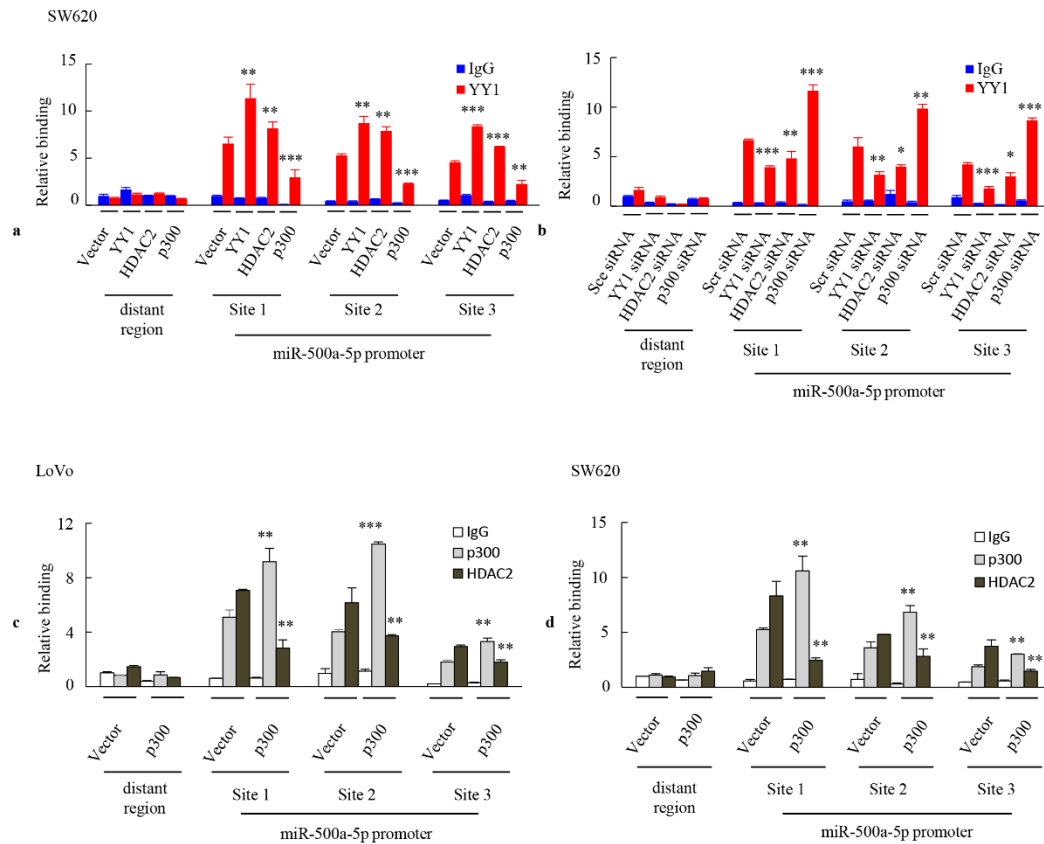

**Supplementary Fig. 11 YY1, p300 and HDAC2 form a complex regulate the miR-500a-5p promoter in CRC cells. (a) & (b)** Analysis of YY1 binding to various miR-500a-5p promoter regions after overexpression of YY1, HDAC2 or p300. Student's t-test. \*\*  $P < 0.05$  and \*\*\*  $P < 0.01$  between vector and gene. **(c) & (d)** Forced expression of p300 down-regulated HDAC2 binding to the miR-500a-5p promoter region. Student's t-test. \*\*  $P < 0.05$  and  $P < 0.01$  between vector and p300. Results of experiments were repeated three times with the same results.

Fig 2c

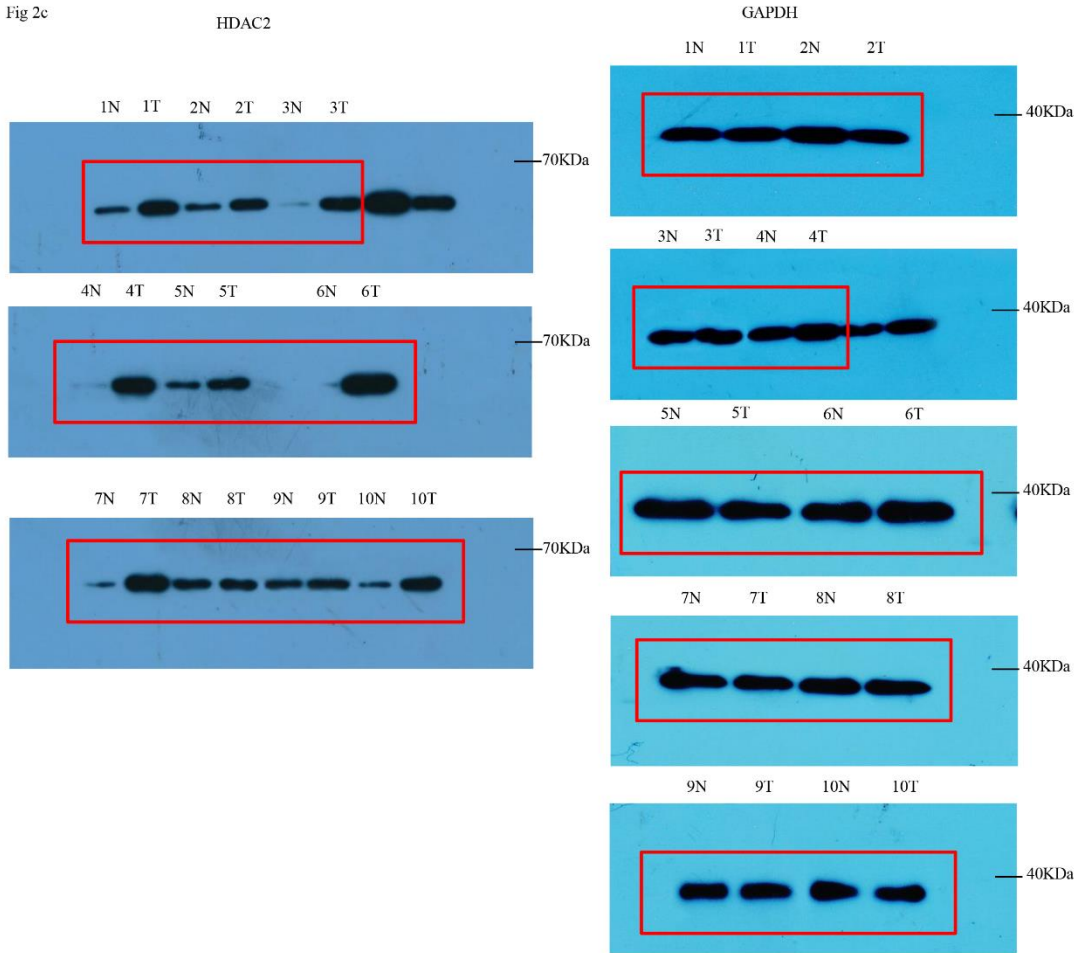

Fig 3c

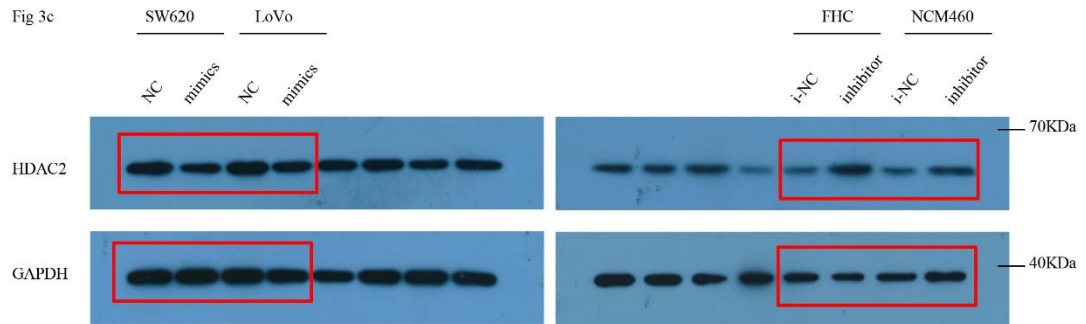

Supplementary Fig. 12 Original Western blotting images of the Fig 2c and Fig 3c.

Supplementary Fig  
13

Fig 5e

YY1

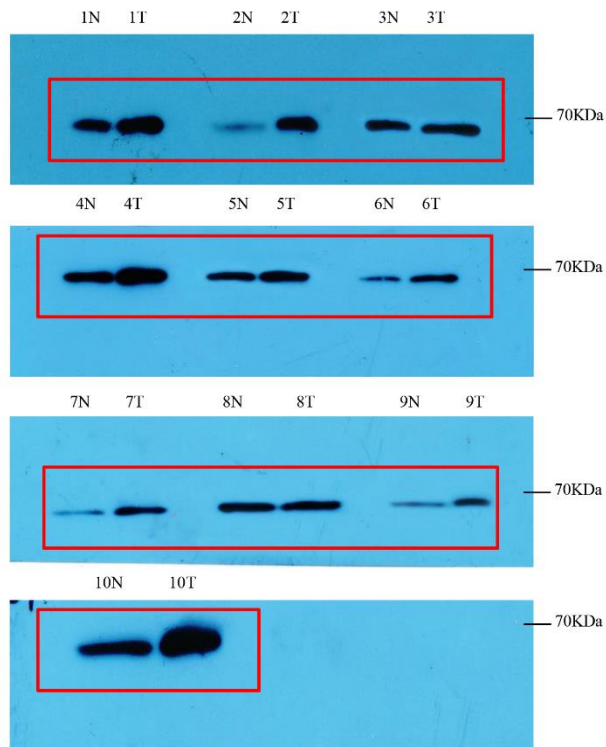

**Supplementary Fig. 13 Original Western blotting images of the Fig 5e.**

Fig 6a

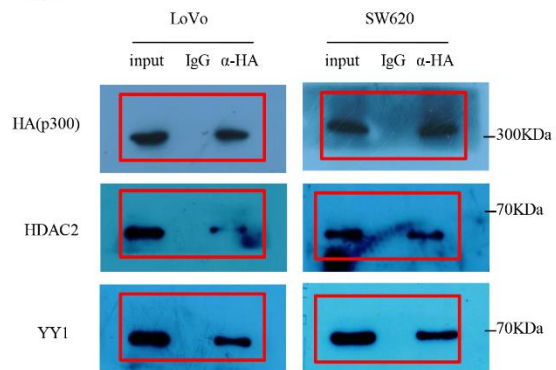

Fig 6b

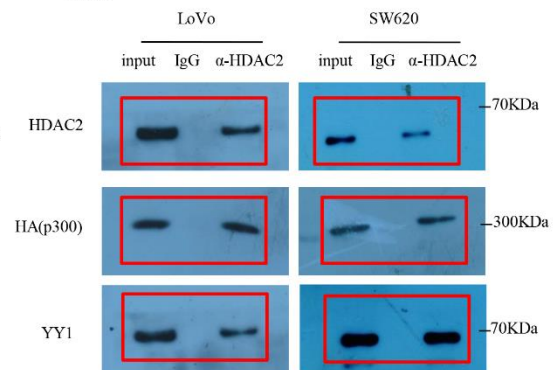

Fig 6c

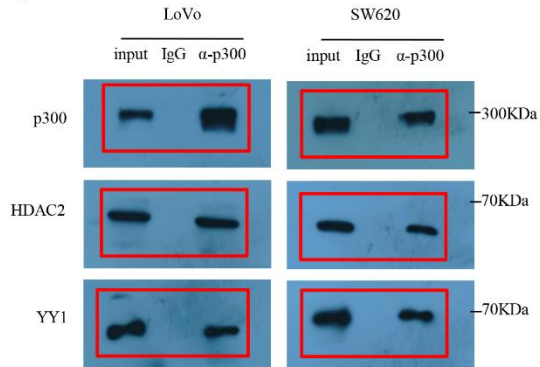

Fig 6d

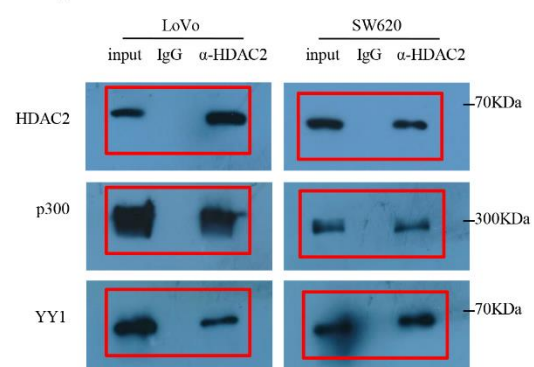

**Supplementary Fig. 14 Original Western blotting images of the Fig 6a~d.**

Supplementary Fig. 4b

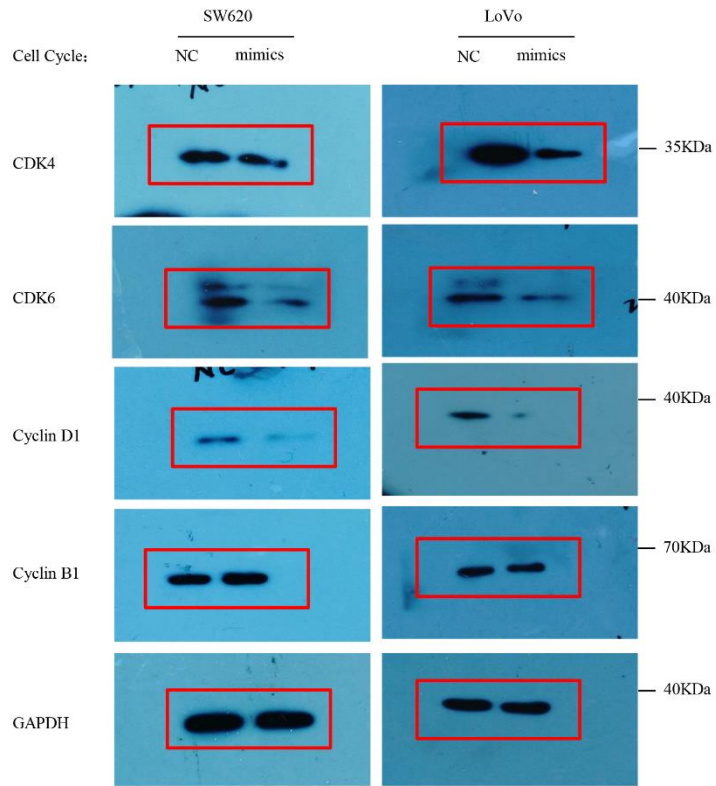

Supplementary Fig. 7

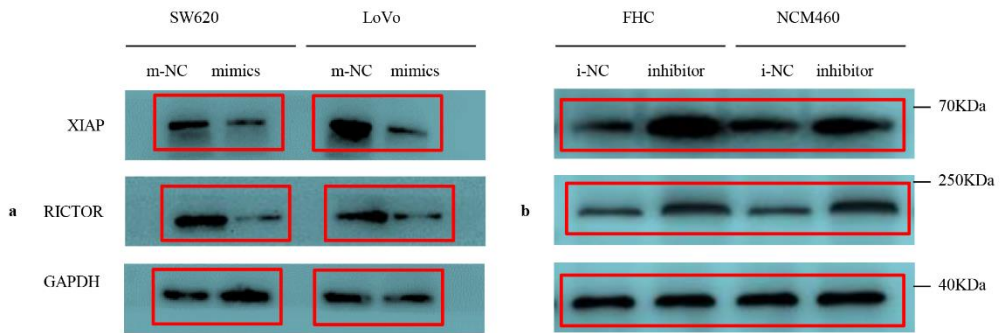

**Supplementary Fig. 15 Original Western blotting images of the Supplementary Fig 4b and Supplementary Fig 7.**

Supplementary Table 1. List of the oligonucleotides primers used for amplification

| Experiment | Name                                         | Position or orientation | Sequence (5'-3')                                 |                                                           |
|------------|----------------------------------------------|-------------------------|--------------------------------------------------|-----------------------------------------------------------|
| q-RT-PCR   | CLCN5                                        | F                       | CATTCTGACCGCCAGGGAAC                             |                                                           |
|            |                                              | R                       | CCCGCATTGGTCATTCAGG                              |                                                           |
|            | HDAC2                                        | F                       | AGACTGCAGTTGCCCTTGAT                             |                                                           |
|            |                                              | R                       | TGCGCAAATTTTCAAACAAA                             |                                                           |
|            | YY1                                          | F                       | GAAGCCCTTTCAGTGCACGTT                            |                                                           |
|            |                                              | R                       | ACATAGGGCCTGTCTCCGGTAT                           |                                                           |
|            | GAPDH                                        | F                       | AAATCCCATCACCATCTTCC                             |                                                           |
|            |                                              | R                       | TCACACCCATGACGAACA                               |                                                           |
|            | mature miR-500a-5p                           | RT                      | CTCAACTGGTGTCGTGGAGTCGGCAATT<br>CAGTTGAGTCTCTCCC |                                                           |
|            |                                              | R                       | ACACTCCAGCTGGGTAATCCTTGCTACCTG<br>G              |                                                           |
|            | precursor miR-500a-5p                        | F                       | ATCCTTGCTACCTGGGTGAGA                            |                                                           |
|            |                                              | R                       | GCTCTCGCTCTCAGAATCCTT                            |                                                           |
|            | Primary miR-500a-5p                          | F                       | TGAGCCCTCTCACTGAACATT                            |                                                           |
|            |                                              | R                       | CTCTCACCCAGGTAGCAAGG                             |                                                           |
|            | snRNA U6                                     | F                       | CTCGCTTCGGCAGCACATATA                            |                                                           |
|            |                                              | R                       | AACGCTTCACGAATTTGCGT                             |                                                           |
|            | Luciferase Constructs (miR-500a-5p promoter) | R1                      | -5 ~ +16                                         | R: 5' - GAAGATCT<br>TGTTCTGCTCCCCCTCTCTA<br>(Bgl II) -3'  |
|            |                                              | Site 1                  | -333 ~ -327                                      | F: 5' - GGGGTACC<br>TCAGATGATCTGGTGCATGT<br>(KPN I) -3' * |

|                                       |                   |                |                                                                        |
|---------------------------------------|-------------------|----------------|------------------------------------------------------------------------|
|                                       | R2                | -368 ~ -341    | R: 5' - GAAGATCT<br>GACACCATTTAAGAGGTAGGCTTT<br>(Bgl II) -3'           |
|                                       | Site 2            | -628 ~ -622    | F: 5' - GGGGTACC<br>GAC <u>ACCATT</u> TAAGAGGTAGGCTTT<br>(KPN I) -3' * |
|                                       | R3                | -657 ~ -630    | R: 5' - GAAGATCT<br>CAAGAAAATGAAATAAAGTATAGTACC<br>(Bgl II) -3'        |
|                                       | Site 3            | -747 ~ -741    | F: 5' - GGGGTACC<br><u>ACCAT</u> CCCCCTTAAAAATGCA<br>(KPN I) -3' *     |
|                                       | R1                | -5 ~ +16       | R: 5' - GAAGATCT<br>TGTTCTGCTCCCCCTCTCTA<br>(Bgl II) -3'               |
|                                       | p-Luc-1kb         | -1003 ~ -979   | F: 5' - GGGGTACC<br>TCTCTCTCTGTGCACACACACAC<br>(KPN I) -3'             |
| Chip<br>(miR-500a-<br>5p<br>promoter) | Chip 1            | F: -371 ~ -391 | TCACCCAGACTCACCAAGT                                                    |
|                                       |                   | R: -197 ~ -217 | GAGGAGTGTGAAAGGGAGGA                                                   |
|                                       | Chip 2            | F: -662 ~ -682 | TAAAAATATTGACGGCTGTG                                                   |
|                                       |                   | R: -504 ~ -524 | ACGAACCTTGGAACAAATG                                                    |
|                                       | Chip 3            | F: -816 ~ -838 | GATGAATCTGTGTATCCCCTTG                                                 |
|                                       |                   | R: -658 ~ -676 | TGGCACACAGCCGTCAATA                                                    |
|                                       | Distant<br>region | -4280 ~ -4260  | GATTTGCAGCCGATTCATTT                                                   |
|                                       |                   | -4071 ~ -4051  | TCCCCTTTTCCTGCCTTATT                                                   |
| siRNA                                 | p300              | Sense          | 5'- AACCCCUCCUCUUCAGCACCA-3'                                           |
|                                       | HDAC2             |                | 5'- AAGCATCAGGATTCTGTTA -3'                                            |
|                                       | YY1               |                | 5'- CGAGGAUCAGAUUCUCAUC -3'                                            |

\* Bold and underline: YY1 binding sites



Supplementary table 2. Correlation between miR-500a-5p expression and the clinicopathological parameters of CRC

| Characteristics              | Case | miR-500a expression (%) |           | $\chi^2$ value | P value |
|------------------------------|------|-------------------------|-----------|----------------|---------|
|                              |      | Low                     | High      |                |         |
| <b>Sex</b>                   |      |                         |           |                |         |
| Male                         | 50   | 26(52.0%)               | 24(48.0%) | 0.100          | 0.752   |
| Female                       | 31   | 15(48.4%)               | 16(51.6%) |                |         |
| <b>Age(yr)</b>               |      |                         |           |                |         |
| <60                          | 41   | 19(46.3%)               | 22(53.7%) | 0.607          | 0.436   |
| ≥60                          | 40   | 22(55.0%)               | 18(45.0%) |                |         |
| <b>Tumor size</b>            |      |                         |           |                |         |
| <3cm                         | 10   | 3(30.0%)                | 7(70.0%)  | 1.113          | 0.291   |
| ≥3cm                         | 71   | 38(53.5%)               | 33(46.5%) |                |         |
| <b>Differentiation</b>       |      |                         |           |                |         |
| Well                         | 6    | 1(16.7%)                | 5(83.3%)  | 9.121          | 0.007*  |
| Moderate                     | 65   | 31(47.7%)               | 34(52.3%) |                |         |
| Poor                         | 10   | 9(90.0%)                | 1(10.0%)  |                |         |
| <b>Lymph node metastasis</b> |      |                         |           |                |         |
| Present                      | 29   | 25(86.2%)               | 4(13.8%)  | 22.89          | <0.001* |
| Absent                       | 52   | 16(30.8%)               | 36(69.2%) |                |         |
| <b>TNM stage(AJCC)</b>       |      |                         |           |                |         |
| 0-II                         | 46   | 13(28.3%)               | 33(71.7%) | 21.287         | <0.001* |
| III-III                      | 35   | 28(80.0%)               | 7(20.0%)  |                |         |

Supplementary table 3. Correlation between HDAC2 expression and the clinicopathological parameters of CRC

| Characteristics              | Case | HDAC2 expression (%) |           | $\chi^2$ value | P value |
|------------------------------|------|----------------------|-----------|----------------|---------|
|                              |      | Low                  | High      |                |         |
| <b>Sex</b>                   |      |                      |           |                |         |
| Male                         | 50   | 20(40.0%)            | 30(60.0%) | 4.601          | 0.032*  |
| Female                       | 31   | 20(64.5%)            | 11(35.5%) |                |         |
| <b>Age(yr)</b>               |      |                      |           |                |         |
| <60                          | 41   | 24(58.5%)            | 17(41.5%) | 2.783          | 0.095   |
| ≥60                          | 40   | 16(40.0%)            | 24(60.0%) |                |         |
| <b>Tumor size</b>            |      |                      |           |                |         |
| <3cm                         | 10   | 6(60.0%)             | 4(40.0%)  | 0.514          | 0.473   |
| ≥3cm                         | 71   | 34(47.9%)            | 37(52.1%) |                |         |
| <b>Differentiation</b>       |      |                      |           |                |         |
| Well                         | 6    | 6(100%)              | 0(0.0%)   | 7.734          | 0.018*  |
| Moderate                     | 65   | 31(47.7%)            | 34(52.3%) |                |         |
| Poor                         | 10   | 3(30.0%)             | 7(70.0%)  |                |         |
| <b>Lymph node metastasis</b> |      |                      |           |                |         |
| Present                      | 29   | 10 (34.5%)           | 19(65.5%) | 4.012          | 0.045*  |
| Absent                       | 52   | 30(56.7%)            | 22(42.3%) |                |         |
| <b>TNM stage(AJCC)</b>       |      |                      |           |                |         |
| 0-II                         | 46   | 28(60.9%)            | 18(39.1%) | 5.620          | 0.018*  |
| III-VI                       | 35   | 12(34.3%)            | 23(65.7%) |                |         |

Supplementary table 4. Correlation between YY1 expression and the clinicopathological parameters of CRC

| Characteristics              | Case | YY1 expression (%) |           | $\chi^2$ value | P value |
|------------------------------|------|--------------------|-----------|----------------|---------|
|                              |      | Low                | High      |                |         |
| <b>Sex</b>                   |      |                    |           |                |         |
| Male                         | 50   | 24(48.0%)          | 26(52.0%) | 0.1            | 0.752   |
| Female                       | 31   | 16(51.6%)          | 15(48.4%) |                |         |
| <b>Age(yr)</b>               |      |                    |           |                |         |
| <60                          | 41   | 19(46.3%)          | 22(53.7%) | 0.307          | 0.579   |
| ≥60                          | 40   | 21(52.5.0%)        | 19(47.5%) |                |         |
| <b>Tumor size</b>            |      |                    |           |                |         |
| <3cm                         | 10   | 8(80.0%)           | 2(20.0%)  | 2.995          | 0.084   |
| ≥3cm                         | 71   | 32(45.1%)          | 39(54.9%) |                |         |
| <b>Differentiation</b>       |      |                    |           |                |         |
| Well                         | 6    | 6(100%)            | 0(0%)     | 11.517         | 0.004*  |
| Moderate                     | 65   | 32(49.2%)          | 33(52.8%) |                |         |
| Poor                         | 10   | 2(20.0%)           | 8(80.0%)  |                |         |
| <b>Lymph node metastasis</b> |      |                    |           |                |         |
| Present                      | 29   | 7(24.1%)           | 22(75.9%) | 11.517         | 0.001*  |
| Absent                       | 52   | 33(63.5%)          | 19(36.5%) |                |         |
| <b>TNM stage(AJCC)</b>       |      |                    |           |                |         |
| 0-II                         | 46   | 29(63.0%)          | 17(37.0%) | 7.948          | 0.005*  |
| III-III                      | 35   | 11(31.4%)          | 24(68.6%) |                |         |

Supplementary table 5. HDAC2 interaction partners by LC-MS/MS analysis in LoVo cells

| Gene Name    | Accession          | Score      | Mass         | Matches        | emPA<br>I   | Protein description                                                          |
|--------------|--------------------|------------|--------------|----------------|-------------|------------------------------------------------------------------------------|
| MYH9         | A0A024R1N1_HUMAN   | 5673       | 227646       | 255 (199)      | 12.69       | Myosin, heavy polypeptide 9, non-muscle, isoform CRA_a                       |
| KRT1         | K2C1_HUMAN         | 3052       | 66170        | 140 (109)      | 12.05       | Keratin, type II cytoskeletal 1                                              |
| HSPA8        | HSP7C_HUMAN        | 1524       | 71082        | 60 (51)        | 7.36        | Heat shock cognate 71 kDa protein                                            |
| MCM5         | B1AHB0_HUMAN       | 1339       | 83031        | 84 (60)        | 7.1         | DNA helicase                                                                 |
| MCM7         | B2RBA6_HUMAN       | 1404       | 81856        | 69 (54)        | 6.72        | DNA replication licensing factor MCM7                                        |
| KRT2         | K22E_HUMAN         | 1283       | 65678        | 65 (50)        | 5.71        | Keratin, type II cytoskeletal 2 epidermal                                    |
| KRT9         | K1C9_HUMAN         | 1499       | 62255        | 81 (53)        | 4.75        | Keratin, type I cytoskeletal 9                                               |
| KRT10        | K1C10_HUMAN        | 1047       | 59020        | 53 (39)        | 4.37        | Keratin, type I cytoskeletal 10                                              |
| PABPC1       | A0A087WTT1_HUMAN   | 746        | 58727        | 45 (32)        | 4.13        | Polyadenylate-binding protein                                                |
| UBA52        | M0R1V7_HUMAN       | 137        | 7128         | 9 (5)          | 4.06        | Ubiquitin-60S ribosomal protein L40 (Fragment)                               |
| MTA2         | A0A024R534_HUMAN   | 835        | 75717        | 53 (40)        | 4.01        | Metastasis associated 1 family, member 2, isoform CRA_a                      |
| RT14         | K1C14_HUMAN        | 602        | 51872        | 40 (28)        | 3.67        | Keratin, type I cytoskeletal 14                                              |
| KRT5         | K2C5_HUMAN         | 552        | 62568        | 41 (32)        | 3.64        | Keratin, type II cytoskeletal 5                                              |
| EIF4G2       | D3DQV9_HUMAN       | 965        | 102778       | 82 (59)        | 3.36        | Eukaryotic translation initiation factor 4 gamma 2 (Fragment)                |
| HSPA5        | BIP_HUMAN          | 871        | 72402        | 41 (29)        | 2.62        | Endoplasmic reticulum chaperone BiP                                          |
| HSP90AB1     | A0A024RD80_HUMAN   | 1034       | 83554        | 55 (39)        | 2.56        | Heat shock protein 90kDa alpha (Cytosolic), class B member 1, isoform CRA_a  |
| KRT17        | K1C17_HUMAN        | 374        | 48361        | 37 (21)        | 2.5         | Keratin, type I cytoskeletal 17                                              |
| RAVER1       | A0A087WZ13_HUMAN   | 701        | 78309        | 41 (32)        | 2.43        | Ribonucleoprotein PTB-binding 1                                              |
| DDX5         | B5BUE6_HUMAN       | 591        | 69591        | 57 (27)        | 2.32        | ATP-dependent RNA helicase DDX5 (Fragment)                                   |
| <b>HDAC2</b> | <b>HDAC2_HUMAN</b> | <b>364</b> | <b>55899</b> | <b>31 (21)</b> | <b>2.32</b> | <b>Histone deacetylase 2</b>                                                 |
| SNW1         | Q6I9S2_HUMAN       | 539        | 61468        | 42 (24)        | 2.31        | SNW1 protein                                                                 |
| KRT16        | K1C16_HUMAN        | 486        | 51578        | 32 (20)        | 2.24        | Keratin, type I cytoskeletal 16                                              |
| ACTB         | ACTB_HUMAN         | 345        | 42052        | 19 (16)        | 2.11        | Actin, cytoplasmic 1                                                         |
| PPP1R13L     | A0A024R0Q5_HUMAN   | 949        | 89378        | 48 (33)        | 2.05        | Protein phosphatase 1, regulatory (Inhibitor) subunit 13 like, isoform CRA_a |
| TRIM29       | A0A024R3J1_HUMAN   | 557        | 66478        | 40 (24)        | 2.03        | Tripartite motif-containing 29, isoform CRA_a                                |

|          |                  |      |        |         |      |                                                               |
|----------|------------------|------|--------|---------|------|---------------------------------------------------------------|
| PCK2     | PCKGM_HUMAN      | 585  | 71452  | 41 (27) | 1.94 | Phosphoenolpyruvate carboxykinase [GTP], mitochondrial        |
| DDX17    | A0A1X7SBZ2_HUMAN | 739  | 80888  | 39 (29) | 1.92 | Probable ATP-dependent RNA helicase DDX17                     |
| KRT6B    | K2C6B_HUMAN      | 590  | 60315  | 42 (32) | 1.89 | Keratin, type II cytoskeletal 6B                              |
| DCD      | DCD_HUMAN        | 93   | 11391  | 5 (4)   | 1.87 | Dermcidin                                                     |
| PFKP     | PFKAP_HUMAN      | 864  | 86454  | 42 (32) | 1.83 | ATP-dependent 6-phosphofructokinase, platelet type            |
| TRAJ56   | A0A075B6Z2_HUMAN | 32   | 2220   | 27 (2)  | 1.81 | T cell receptor alpha joining 56 (Fragment)                   |
| DDX3X    | A0A0D9SF53_HUMAN | 660  | 82110  | 40 (28) | 1.77 | ATP-dependent RNA helicase DDX3X                              |
| RBM14    | A0A0S2Z4Z0_HUMAN | 657  | 69620  | 36 (24) | 1.76 | RNA binding motif protein 14 isoform 1 (Fragment)             |
| RPS6KA1  | KS6A1_HUMAN      | 440  | 83070  | 36 (26) | 1.74 | Ribosomal protein S6 kinase alpha-1                           |
| MAGED2   | A0A024R9Y7_HUMAN | 686  | 65085  | 30 (22) | 1.68 | Melanoma antigen family D, 2, isoform CRA_a                   |
| ARHGEF7  | A0A024RDY9_HUMAN | 369  | 73664  | 32 (22) | 1.61 | Rho guanine nucleotide exchange factor (GEF) 7, isoform CRA_b |
| ASNS     | ASNS_HUMAN       | 494  | 64899  | 38 (23) | 1.55 | Asparagine synthetase [glutamine-hydrolyzing]                 |
| HDAC1    | HDAC1_HUMAN      | 313  | 55638  | 21 (17) | 1.51 | Histone deacetylase 1                                         |
| FLJ11806 | A0A024R6F2_HUMAN | 447  | 49006  | 16 (14) | 1.49 | Nuclear protein UKp68, isoform CRA_a                          |
| CPS1     | Q5R208_HUMAN     | 1136 | 165943 | 72 (48) | 1.45 | Carbamoylphosphate synthetase I                               |
| FUS      | FUS_HUMAN        | 351  | 53622  | 15 (15) | 1.45 | RNA-binding protein FUS                                       |
| CCT3     | TCPG_HUMAN       | 351  | 61066  | 26 (16) | 1.31 | T-complex protein 1 subunit gamma                             |
| PROSER2  | PRSR2_HUMAN      | 296  | 46116  | 19 (13) | 1.29 | Proline and serine-rich protein 2                             |
| RPS3     | H0YEU2_HUMAN     | 123  | 18774  | 7 (5)   | 1.28 | 40S ribosomal protein S3 (Fragment)                           |
| CSTA     | CYTA_HUMAN       | 78   | 11000  | 4 (3)   | 1.27 | Cystatin-A                                                    |
| GIT1     | A0A0C4DGN6_HUMAN | 664  | 83821  | 32 (22) | 1.24 | ARF GTPase-activating protein GIT1                            |
| SEC13    | C9J0S2_HUMAN     | 24   | 3138   | 1 (1)   | 1.24 | Protein SEC13 homolog (Fragment)                              |
| UBC      | F5H2Z3_HUMAN     | 110  | 15300  | 8 (4)   | 1.23 | Polyubiquitin-C (Fragment)                                    |
| ZC3H14   | ZC3HE_HUMAN      | 579  | 83793  | 26 (20) | 1.15 | Zinc finger CCCH domain-containing protein 14                 |
| GATAD2A  | A0A024R7K7_HUMAN | 353  | 68363  | 26 (18) | 1.12 | GATA zinc finger domain containing 2A, isoform CRA_b          |
| PABPC4   | B1ANR0_HUMAN     | 248  | 68156  | 23 (16) | 1.12 | Polyadenylate-binding protein                                 |
| AGPS     | ADAS_HUMAN       | 415  | 73664  | 22 (17) | 1.1  | Alkyldihydroxyacetonephosphate synthase, peroxisomal          |
| ALPL     | A0A024RAG0_HUMAN | 359  | 57611  | 23 (15) | 1.06 | Alkaline phosphatase                                          |
| NCOR2    | A0A024RBS3_HUMAN | 1286 | 274461 | 97 (63) | 1.05 | Nuclear receptor co-repressor 2, isoform CRA_c                |

|          |                  |     |       |         |      |                                                                |
|----------|------------------|-----|-------|---------|------|----------------------------------------------------------------|
| CLINT1   | A0A0S2Z4Y4_HUMAN | 442 | 68273 | 17 (15) | 1.02 | Clathrin interactor 1 isoform 1 (Fragment)                     |
| KRT14    | K1C14_HUMAN      | 189 | 51872 | 14 (11) | 0.97 | Keratin, type I cytoskeletal 14                                |
| G3BP1    | Q32P45_HUMAN     | 376 | 52155 | 34 (11) | 0.96 | GTPase activating protein (SH3 domain) binding protein 1       |
| DDX1     | A0A087X2G1_HUMAN | 318 | 74898 | 25 (16) | 0.9  | ATP-dependent RNA helicase DDX1                                |
| NUSAP1   | NUSAP_HUMAN      | 275 | 49593 | 18 (10) | 0.9  | Nucleolar and spindle-associated protein 1                     |
| PAPSS2   | PAPS2_HUMAN      | 386 | 70027 | 17 (14) | 0.9  | Bifunctional 3'-phosphoadenosine 5'-phosphosulfate synthase 2  |
| RPL13    | A8K4C8_HUMAN     | 126 | 24304 | 9 (5)   | 0.9  | 60S ribosomal protein L13                                      |
| ALB      | ALBU_HUMAN       | 267 | 71317 | 20 (14) | 0.88 | Serum albumin                                                  |
| JUP      | A0A024R1X8_HUMAN | 360 | 82416 | 18 (16) | 0.87 | Junction plakoglobin, isoform CRA_a                            |
| CRTC3    | CRTC3_HUMAN      | 529 | 67089 | 20 (14) | 0.86 | CREB-regulated transcription coactivator 3                     |
| SF1      | A0A024R566_HUMAN | 229 | 62135 | 18 (12) | 0.86 | Splicing factor 1, isoform CRA_a                               |
| SUGP1    | SUGP1_HUMAN      | 458 | 72540 | 21 (14) | 0.86 | SURP and G-patch domain-containing protein 1                   |
| CCT6A    | A0A024RDL1_HUMAN | 183 | 58444 | 19 (11) | 0.83 | Chaperonin containing TCP1, subunit 6A (Zeta 1), isoform CRA_a |
| EEF2     | EF2_HUMAN        | 357 | 96246 | 34 (18) | 0.83 | Elongation factor 2                                            |
| GATAD2B  | A0A0U1RRM1_HUMAN | 360 | 63764 | 23 (15) | 0.83 | Transcriptional repressor p66-beta                             |
| KLC4     | A0A024RCZ8_HUMAN | 357 | 69054 | 23 (13) | 0.83 | Kinesin light chain 4, isoform CRA_a                           |
| MTA3     | E7EQY4_HUMAN     | 176 | 59317 | 22 (11) | 0.81 | Metastasis-associated protein MTA3                             |
| TRIM25   | D3DTY9_HUMAN     | 143 | 48358 | 15 (9)  | 0.81 | Tripartite motif-containing 25, isoform CRA_a                  |
| PKP3     | PKP3_HUMAN       | 314 | 87485 | 27 (17) | 0.8  | Plakophilin-3                                                  |
| KRT6A    | A0A0S2Z428_HUMAN | 273 | 60293 | 18 (11) | 0.79 | HCG2039812, isoform CRA_b (Fragment)                           |
| EI24     | A0A087WV44_HUMAN | 25  | 4801  | 3 (1)   | 0.77 | Etoposide-induced protein 2.4 homolog                          |
| HSP90AA1 | HS90A_HUMAN      | 566 | 85006 | 30 (17) | 0.76 | Heat shock protein HSP 90-alpha                                |
| SLC3A2   | J3KPF3_HUMAN     | 392 | 68230 | 18 (12) | 0.76 | 4F2 cell-surface antigen heavy chain                           |
| HIST1H1D | H13_HUMAN        | 98  | 22336 | 25 (4)  | 0.75 | Histone H1.3                                                   |
| HNRPK    | A0A024R228_HUMAN | 190 | 51472 | 20 (10) | 0.75 | Heterogeneous nuclear ribonucleoprotein K, isoform CRA_d       |
| PPM1H    | S5ZYJ2_HUMAN     | 18  | 4893  | 1 (1)   | 0.75 | SRGAP1/PPM1H fusion protein                                    |
| RARS     | SYRC_HUMAN       | 216 | 76129 | 20 (13) | 0.73 | Arginine--tRNA ligase, cytoplasmic                             |
| CNOT4    | A0A024R781_HUMAN | 284 | 71427 | 16 (12) | 0.72 | CCR4-NOT transcription complex, subunit 4, isoform CRA_b       |
| ABCF2    | A0A090N7X1_HUMAN | 191 | 71815 | 22 (12) | 0.71 | ATP-binding cassette, sub-family F (GCN20), member 2           |

|          |                  |     |        |         |      |                                                                              |
|----------|------------------|-----|--------|---------|------|------------------------------------------------------------------------------|
| TFRC     | TFR1_HUMAN       | 385 | 85274  | 22 (14) | 0.7  | Transferrin receptor protein 1                                               |
| EEF1A1   | EF1A1_HUMAN      | 130 | 50451  | 12 (8)  | 0.66 | Elongation factor 1-alpha 1<br>Ras-GTPase activating protein SH3             |
| G3BP2    | A0A024RDB2_HUMAN | 224 | 50843  | 10 (8)  | 0.65 | domain-binding protein 2, isoform<br>CRA_b                                   |
| HADHA    | ECHA_HUMAN       | 293 | 83688  | 20 (13) | 0.65 | Trifunctional enzyme subunit alpha,<br>mitochondrial                         |
| RPS16    | M0QX76_HUMAN     | 45  | 5611   | 1 (1)   | 0.64 | 40S ribosomal protein S16<br>(Fragment)                                      |
| NELFA    | A0A0C4DFX9_HUMAN | 261 | 58691  | 16 (9)  | 0.63 | Negative elongation factor A                                                 |
| TBL1XR1  | A0A0D9SF63_HUMAN | 174 | 52037  | 13 (8)  | 0.63 | F-box-like/WD repeat-containing<br>protein TBL1XR1                           |
| GFPT1    | GFPT1_HUMAN      | 248 | 79555  | 17 (12) | 0.62 | Glutamine--fructose-6-phosphate<br>aminotransferase [isomerizing] 1          |
| DPYSL2   | A0A1C7CYX9_HUMAN | 392 | 74027  | 16 (12) | 0.61 | Dihydropyrimidinase-related protein<br>2                                     |
| RCOR1    | RCOR1_HUMAN      | 259 | 53409  | 10 (9)  | 0.61 | REST corepressor 1                                                           |
| TCP1     | TCPA_HUMAN       | 186 | 60819  | 15 (9)  | 0.61 | T-complex protein 1 subunit alpha                                            |
| BAG3     | BAG3_HUMAN       | 365 | 61728  | 17 (9)  | 0.6  | BAG family molecular chaperone<br>regulator 3                                |
| CANX     | CALX_HUMAN       | 294 | 67982  | 13 (10) | 0.6  | Calnexin                                                                     |
| CDKN2AIP | CARF_HUMAN       | 370 | 61544  | 15 (9)  | 0.6  | CDKN2A-interacting protein                                                   |
| EHD2     | A0A024R0S6_HUMAN | 121 | 61294  | 17 (10) | 0.6  | EH-domain containing 2, isoform<br>CRA_a                                     |
| HSPD1    | A0A024R3X4_HUMAN | 193 | 61187  | 13 (11) | 0.6  | Heat shock 60kDa protein 1<br>(Chaperonin), isoform CRA_a                    |
| RPN1     | RPN1_HUMAN       | 286 | 68641  | 21 (10) | 0.6  | Dolichyl-diphosphooligosaccharide--<br>protein glycosyltransferase subunit 1 |
| FXR1     | A0A0F7KYT8_HUMAN | 285 | 76495  | 16 (11) | 0.59 | Fragile X mental retardation<br>autosomal homolog variant p2K                |
| KLC2     | KLC2_HUMAN       | 211 | 69291  | 17 (10) | 0.59 | Kinesin light chain 2                                                        |
| BSG      | BASL_HUMAN       | 142 | 42573  | 6 (6)   | 0.57 | Basigin                                                                      |
| CCT5     | E9PCA1_HUMAN     | 132 | 57564  | 16 (8)  | 0.56 | T-complex protein 1 subunit epsilon                                          |
| RPS25    | RS25_HUMAN       | 63  | 13791  | 3 (2)   | 0.56 | 40S ribosomal protein S25                                                    |
| ABCF3    | A0A0S2Z5L1_HUMAN | 247 | 80094  | 13 (11) | 0.55 | ATP-binding cassette sub-family F<br>member 3 isoform 1 (Fragment)           |
| CKAP4    | A0A024RBH2_HUMAN | 329 | 66097  | 14 (9)  | 0.55 | Cytoskeleton-associated protein 4,<br>isoform CRA_c                          |
| HSRP     | A0A087WTP3_HUMAN | 240 | 73438  | 15 (10) | 0.55 | Far upstream element-binding protein<br>2                                    |
| FXR2     | FXR2_HUMAN       | 215 | 74520  | 14 (10) | 0.54 | Fragile X mental retardation<br>syndrome-related protein 2                   |
| PRRC2C   | PRC2C_HUMAN      | 967 | 317346 | 73 (42) | 0.54 | Protein PRRC2C                                                               |

|            |                  |     |        |         |      |                                                                          |
|------------|------------------|-----|--------|---------|------|--------------------------------------------------------------------------|
| RPRD2      | RPRD2_HUMAN      | 661 | 156380 | 31 (21) | 0.54 | Regulation of nuclear pre-mRNA domain-containing protein 2               |
| ABCE1      | ABCE1_HUMAN      | 204 | 68240  | 18 (10) | 0.53 | ATP-binding cassette sub-family E member 1                               |
| AGFG1      | A0A0S2Z3Y3_HUMAN | 342 | 60213  | 14 (8)  | 0.53 | ArfGAP with FG repeats 1 isoform 4 (Fragment)                            |
| ESS2       | ESS2_HUMAN       | 201 | 52593  | 13 (7)  | 0.53 | Splicing factor ESS-2 homolog                                            |
| WNK1       | WNK1_HUMAN       | 743 | 251552 | 48 (34) | 0.53 | Serine/threonine-protein kinase WNK1                                     |
| GIT2       | GIT2_HUMAN       | 206 | 85117  | 22 (11) | 0.52 | ARF GTPase-activating protein GIT2                                       |
| IRF2BP2    | I2BP2_HUMAN      | 414 | 61728  | 14 (8)  | 0.51 | Interferon regulatory factor 2-binding protein 2                         |
| NONO       | A0A0S2Z4Z9_HUMAN | 112 | 54311  | 18 (8)  | 0.51 | Non-POU domain containing octamer-binding isoform 1 (Fragment)           |
| PFKL       | PFKAL_HUMAN      | 342 | 85762  | 20 (11) | 0.51 | ATP-dependent 6-phosphofructokinase, liver type                          |
| RPL3       | RL3_HUMAN        | 151 | 46365  | 8 (6)   | 0.51 | 60S ribosomal protein L3                                                 |
| ACADVL     | ACADV_HUMAN      | 362 | 70745  | 16 (10) | 0.5  | Very long-chain specific acyl-CoA dehydrogenase, mitochondrial           |
| MYH10      | MYH10_HUMAN      | 591 | 229827 | 40 (29) | 0.5  | Myosin-10                                                                |
| MTA1       | E7ESY4_HUMAN     | 174 | 80008  | 16 (10) | 0.49 | Metastasis-associated protein MTA1                                       |
| RPL4       | RL4_HUMAN        | 94  | 47953  | 12 (6)  | 0.49 | 60S ribosomal protein L4                                                 |
| TRIM25     | TRI25_HUMAN      | 171 | 72581  | 14 (9)  | 0.49 | E3 ubiquitin/ISG15 ligase TRIM25                                         |
| CHD4       | A0A0C4DGG9_HUMAN | 349 | 221933 | 45 (27) | 0.48 | Chromodomain-helicase-DNA-binding protein 4                              |
| SDHA       | A0A024QZ30_HUMAN | 250 | 73672  | 15 (10) | 0.48 | Succinate dehydrogenase [ubiquinone] flavoprotein subunit, mitochondrial |
| RPL6       | A0A024RBK3_HUMAN | 83  | 32765  | 9 (4)   | 0.47 | 60S ribosomal protein L6                                                 |
| TMPO       | LAP2A_HUMAN      | 274 | 76016  | 13 (10) | 0.46 | Lamina-associated polypeptide 2, isoform alpha                           |
| ZC3HAV1    | ZCCHV_HUMAN      | 343 | 103135 | 15 (13) | 0.45 | Zinc finger CCCH-type antiviral protein 1                                |
| EIF3L      | B0QY89_HUMAN     | 198 | 71085  | 13 (8)  | 0.44 | Eukaryotic translation initiation factor 3 subunit L                     |
| QARS       | SYQ_HUMAN        | 226 | 88655  | 17 (10) | 0.44 | Glutamine--tRNA ligase                                                   |
| ACSL3      | A0A024R497_HUMAN | 175 | 81338  | 13 (9)  | 0.43 | Acyl-CoA synthetase long-chain family member 3, isoform CRA_a            |
| TBL1X      | A0A024RBV9_HUMAN | 178 | 63255  | 12 (7)  | 0.43 | Transducin (Beta)-like 1X-linked, isoform CRA_a                          |
| NSF        | NSF_HUMAN        | 270 | 83055  | 19 (9)  | 0.42 | Vesicle-fusing ATPase                                                    |
| hCG_199525 | A0A024R2J6_HUMAN | 18  | 8595   | 1 (1)   | 0.41 | HCG1995254, isoform CRA_a                                                |



|           |                  |      |        |          |      |                                                                                      |
|-----------|------------------|------|--------|----------|------|--------------------------------------------------------------------------------------|
| HELLS     | A0A0B4J1V9_HUMAN | 171  | 103277 | 23 (11)  | 0.41 | Helicase, lymphoid-specific, isoform CRA_b                                           |
| RPS6KA3   | KS6A3_HUMAN      | 165  | 84025  | 17 (9)   | 0.41 | Ribosomal protein S6 kinase alpha-3                                                  |
| SPRR2F    | SPRR2F_HUMAN     | 32   | 8541   | 2 (1)    | 0.41 | Small proline-rich protein 2F                                                        |
| CTPS1     | PYRG1_HUMAN      | 218  | 67332  | 13 (7)   | 0.4  | CTP synthase 1                                                                       |
| KRT78     | K2C78_HUMAN      | 100  | 57629  | 12 (6)   | 0.4  | Keratin, type II cytoskeletal 78                                                     |
| LPP       | LPP_HUMAN        | 135  | 67129  | 10 (7)   | 0.4  | Lipoma-preferred partner                                                             |
| NCL       | A0A024R4A0_HUMAN | 214  | 76625  | 13 (8)   | 0.4  | Nucleolin, isoform CRA_b                                                             |
| FLNA      | FLNA_HUMAN       | 736  | 283301 | 56 (29)  | 0.39 | Filamin-A                                                                            |
| GRB10     | GRB10_HUMAN      | 146  | 68158  | 11 (7)   | 0.39 | Growth factor receptor-bound protein 10                                              |
| MIER1     | MIER1_HUMAN      | 178  | 58290  | 13 (6)   | 0.39 | Mesoderm induction early response protein 1                                          |
| SLC16A3   | A0A024R8U1_HUMAN | 109  | 50064  | 5 (5)    | 0.38 | Solute carrier family 16 (Monocarboxylic acid transporters), member 3, isoform CRA_a |
| SORBS2    | H7BXR3_HUMAN     | 184  | 70132  | 16 (7)   | 0.38 | Sorbin and SH3 domain-containing protein 2 (Fragment)                                |
| SYNCRIP   | HNRPQ_HUMAN      | 131  | 69788  | 13 (7)   | 0.38 | Heterogeneous nuclear ribonucleoprotein Q                                            |
| PAPSS1    | PAPS1_HUMAN      | 152  | 71586  | 11 (7)   | 0.37 | Bifunctional 3'-phosphoadenosine 5'-phosphosulfate synthase 1                        |
| RACGAP1   | A0A024R136_HUMAN | 231  | 71666  | 14 (8)   | 0.37 | Rac GTPase activating protein 1, isoform CRA_a                                       |
| SMAD4     | A0A024R274_HUMAN | 89   | 61199  | 9 (6)    | 0.37 | Mothers against decapentaplegic homolog                                              |
| COASY     | COASY_HUMAN      | 191  | 62632  | 9 (6)    | 0.36 | Bifunctional coenzyme A synthase                                                     |
| hCG_31253 | A0A024R8A7_HUMAN | 158  | 61944  | 10 (7)   | 0.36 | HCG31253, isoform CRA_a                                                              |
| PRKAA1    | AAPK1_HUMAN      | 175  | 64596  | 9 (6)    | 0.35 | 5'-AMP-activated protein kinase catalytic subunit alpha-1                            |
| RAVER2    | RAVR2_HUMAN      | 98   | 74976  | 11 (7)   | 0.35 | Ribonucleoprotein PTB-binding 2                                                      |
| TPX2      | TPX2_HUMAN       | 192  | 86227  | 14 (8)   | 0.35 | Targeting protein for Xklp2                                                          |
| NUMB      | A0A024R681_HUMAN | 162  | 66485  | 14 (6)   | 0.34 | Numb homolog (Drosophila), isoform CRA_f                                             |
| PRKDC     | PRKDC_HUMAN      | 1033 | 473749 | 100 (43) | 0.34 | DNA-dependent protein kinase catalytic subunit                                       |
| SPRR1B    | SPR1B_HUMAN      | 32   | 10337  | 1 (1)    | 0.34 | Cornifin-B                                                                           |
| STIM1     | STIM1_HUMAN      | 221  | 77660  | 12 (7)   | 0.34 | Stromal interaction molecule 1                                                       |
| YY1       | H0YJV7_HUMAN     | 139  | 21116  | 5 (2)    | 0.34 | Transcriptional repressor protein YY1 (Fragment)                                     |
| GTF2I     | GTF2I_HUMAN      | 217  | 112859 | 18 (10)  | 0.33 | General transcription factor II-I                                                    |
| MARS      | SYMC_HUMAN       | 214  | 102249 | 14 (9)   | 0.33 | Methionine--tRNA ligase, cytoplasmic                                                 |

|                     |                  |     |        |         |      |                                                                    |
|---------------------|------------------|-----|--------|---------|------|--------------------------------------------------------------------|
| RPL18               | J3QQ67_HUMAN     | 66  | 21940  | 5 (2)   | 0.33 | 60S ribosomal protein L18<br>(Fragment)                            |
| ATP6V1A             | VATA_HUMAN       | 161 | 68660  | 9 (6)   | 0.32 | V-type proton ATPase catalytic<br>subunit A                        |
| PRDX1               | A0A0A0MRQ5_HUMAN | 44  | 10727  | 2 (1)   | 0.32 | Peroxiredoxin-1                                                    |
| S100A8              | S10A8_HUMAN      | 34  | 10885  | 2 (1)   | 0.32 | Protein S100-A8                                                    |
| AARS                | SYAC_HUMAN       | 290 | 107484 | 16 (9)  | 0.31 | Alanine--tRNA ligase, cytoplasmic                                  |
| CAT                 | CATA_HUMAN       | 156 | 59947  | 7 (5)   | 0.31 | Catalase                                                           |
| PKM2                | A0A024R5Z9_HUMAN | 166 | 58538  | 9 (5)   | 0.31 | Pyruvate kinase                                                    |
| PODXL               | PODXL_HUMAN      | 112 | 59055  | 6 (5)   | 0.31 | Podocalyxin                                                        |
| EL52                | K9JA46_HUMAN     | 200 | 85006  | 13 (7)  | 0.3  | Epididymis luminal secretory protein<br>52                         |
| LIMA1               | LIMA1_HUMAN      | 161 | 85630  | 12 (7)  | 0.3  | LIM domain and actin-binding<br>protein 1                          |
| RPL15               | A0A024R2Q4_HUMAN | 58  | 24245  | 5 (2)   | 0.3  | Ribosomal protein L15                                              |
| S100A7              | S10A7_HUMAN      | 44  | 11578  | 2 (1)   | 0.3  | Protein S100-A7                                                    |
| SAMHD1              | SAMH1_HUMAN      | 91  | 72896  | 14 (6)  | 0.3  | Deoxynucleoside triphosphate<br>triphosphohydrolase SAMHD1         |
| TNKS1BP1            | A0A024R542_HUMAN | 456 | 182711 | 17 (15) | 0.3  | Tankyrase 1 binding protein 1,<br>182kDa, isoform CRA_a            |
| ELP3                | ELP3_HUMAN       | 137 | 62789  | 13 (5)  | 0.29 | Elongator complex protein 3                                        |
| LSM14A              | LS14A_HUMAN      | 48  | 50727  | 9 (4)   | 0.29 | Protein LSM14 homolog A                                            |
| NUFIP2              | NUFP2_HUMAN      | 297 | 76132  | 7 (6)   | 0.29 | Nuclear fragile X mental retardation-<br>interacting protein 2     |
| ANKHD1-<br>EIF4EBP3 | H7COV5_HUMAN     | 147 | 66378  | 7 (5)   | 0.27 | ANKHD1-EIF4EBP3 readthrough<br>(Fragment)                          |
| FUBP1               | A0A1Z1G4M2_HUMAN | 155 | 67733  | 8 (5)   | 0.27 | FUBP1                                                              |
| LARP4B              | LAR4B_HUMAN      | 159 | 80902  | 13 (6)  | 0.27 | La-related protein 4B                                              |
| ANKRD17             | ANR17_HUMAN      | 471 | 275970 | 34 (20) | 0.26 | Ankyrin repeat domain-containing<br>protein 17                     |
| KPNB1               | IMB1_HUMAN       | 162 | 98420  | 11 (7)  | 0.26 | Importin subunit beta-1                                            |
| SLC7A5              | LAT1_HUMAN       | 174 | 55659  | 7 (4)   | 0.26 | Large neutral amino acids transporter<br>small subunit 1           |
| CAD                 | PYR1_HUMAN       | 334 | 245167 | 39 (17) | 0.25 | CAD protein                                                        |
| EIF2B4              | EI2BD_HUMAN      | 84  | 58035  | 7 (4)   | 0.25 | Translation initiation factor eIF-2B<br>subunit delta              |
| NSUN2               | NSUN2_HUMAN      | 164 | 87214  | 15 (6)  | 0.25 | tRNA (cytosine(34)-C(5))-<br>methyltransferase                     |
| VPS33B              | A0A0S2Z577_HUMAN | 106 | 71225  | 14 (5)  | 0.25 | Vacuolar protein sorting 33-like<br>protein B isoform 1 (Fragment) |
| WRNIP1              | A0A024RAG0_HUMAN | 89  | 57611  | 5 (4)   | 0.25 | Alkaline phosphatase                                               |
| CUL4A               | CUL4A_HUMAN      | 172 | 88138  | 13 (6)  | 0.24 | Cullin-4A                                                          |
| HIST1H2BL           | H2B1L_HUMAN      | 44  | 13944  | 3 (1)   | 0.24 | Histone H2B type 1-L                                               |

|              |                  |     |        |        |      |                                                                      |
|--------------|------------------|-----|--------|--------|------|----------------------------------------------------------------------|
| HIST1H2BM    | H2B1M_HUMAN      | 73  | 13981  | 3 (1)  | 0.24 | Histone H2B type 1-M                                                 |
| SLAIN2       | D6RIF6_HUMAN     | 41  | 44743  | 7 (3)  | 0.24 | SLAIN motif-containing protein 2                                     |
| MAP3K20      | M3K20_HUMAN      | 282 | 91725  | 11 (7) | 0.23 | Mitogen-activated protein kinase kinase kinase 20                    |
| RPL14        | A0PJ62_HUMAN     | 50  | 14716  | 2 (1)  | 0.23 | RPL14 protein (Fragment)                                             |
| TAF15        | RBP56_HUMAN      | 186 | 62021  | 6 (4)  | 0.23 | TATA-binding protein-associated factor 2N                            |
| YX           | ZYX_HUMAN        | 60  | 62436  | 7 (4)  | 0.23 | Zyxin                                                                |
| CD44         | H0Y2P0_HUMAN     | 65  | 31332  | 4 (2)  | 0.22 | CD44 antigen (Fragment)                                              |
| EWSR1        | B0QYK0_HUMAN     | 99  | 65174  | 5 (4)  | 0.22 | RNA-binding protein EWS                                              |
| IGF2BP1      | D3DTW3_HUMAN     | 53  | 48111  | 8 (3)  | 0.22 | Insulin-like growth factor 2 mRNA binding protein 1 deltaN CRDBP     |
| SEPT9        | SEPT9_HUMAN      | 121 | 65646  | 7 (5)  | 0.22 | Septin-9                                                             |
| DTX3L        | DTX3L_HUMAN      | 183 | 84585  | 13 (6) | 0.21 | E3 ubiquitin-protein ligase DTX3L                                    |
| TCF25        | H3BS87_HUMAN     | 30  | 15982  | 4 (1)  | 0.21 | Transcription factor 25 (Fragment)                                   |
| XRCC5        | XRCC5_HUMAN      | 125 | 83222  | 12 (6) | 0.21 | X-ray repair cross-complementing protein 5                           |
| SMAD2        | SMAD1_HUMAN      | 73  | 53025  | 3 (3)  | 0.2  | Mothers against decapentaplegic homolog 1                            |
| TNPO1        | A0A024RAM0_HUMAN | 132 | 103771 | 13 (6) | 0.2  | Transportin 1, isoform CRA_a                                         |
| TUBGCP3      | GCP3_HUMAN       | 184 | 104304 | 11 (6) | 0.2  | Gamma-tubulin complex component 3                                    |
| ABCB7        | A0A2R8Y3N2_HUMAN | 29  | 17550  | 3 (1)  | 0.19 | ATP-binding cassette sub-family B member 7, mitochondrial (Fragment) |
| LMNA         | LMNA_HUMAN       | 213 | 74380  | 15 (5) | 0.19 | Prelamin-A/C                                                         |
| NAP1L4       | E9PP22_HUMAN     | 45  | 17453  | 2 (1)  | 0.19 | Nucleosome assembly protein 1-like 4 (Fragment)                      |
| ATP1A1       | AT1A1_HUMAN      | 201 | 114135 | 14 (6) | 0.18 | Sodium/potassium-transporting ATPase subunit alpha-1                 |
| DAK          | A0A024R529_HUMAN | 83  | 59282  | 6 (3)  | 0.18 | Dihydroxyacetone kinase 2 homolog (Yeast), isoform CRA_a             |
| DUSP28       | DUS28_HUMAN      | 21  | 18654  | 2 (1)  | 0.18 | Dual specificity phosphatase 28                                      |
| EDC3         | EDC3_HUMAN       | 70  | 56784  | 8 (3)  | 0.18 | Enhancer of mRNA-decapping protein 3                                 |
| AP2B1        | A0A087X253_HUMAN | 131 | 101953 | 12 (5) | 0.17 | AP complex subunit beta                                              |
| CD55         | H7BY55_HUMAN     | 105 | 59899  | 11 (4) | 0.17 | Complement decay-accelerating factor                                 |
| CUL4B        | CUL4B_HUMAN      | 81  | 104486 | 13 (5) | 0.17 | Cullin-4B                                                            |
| EIF2AK2      | E2AK2_HUMAN      | 77  | 62512  | 3 (3)  | 0.17 | Interferon-induced, double-stranded RNA-activated protein kinase     |
| ATP5MF-PTCD1 | G3V325_HUMAN     | 85  | 84684  | 10 (4) | 0.16 | ATP5MF-PTCD1 readthrough                                             |
| COPB1        | COPB_HUMAN       | 193 | 108214 | 14 (5) | 0.16 | Coatomer subunit beta                                                |
| DDX21        | DDX21_HUMAN      | 75  | 87804  | 13 (4) | 0.16 | Nucleolar RNA helicase 2                                             |

|         |                  |     |        |         |      |                                                                             |
|---------|------------------|-----|--------|---------|------|-----------------------------------------------------------------------------|
| IGF2BP3 | IF2B3_HUMAN      | 95  | 64008  | 12 (4)  | 0.16 | Insulin-like growth factor 2 mRNA-binding protein 3                         |
| CPSF7   | J3QT54_HUMAN     | 31  | 22606  | 2 (1)   | 0.15 | Cleavage and polyadenylation-specificity factor subunit 7 (Fragment)        |
| CSDE1   | A0A024R0E2_HUMAN | 67  | 89684  | 7 (4)   | 0.15 | Cold shock domain containing E1, RNA-binding, isoform CRA_a                 |
| DHX15   | DHX15_HUMAN      | 97  | 91673  | 10 (4)  | 0.15 | Pre-mRNA-splicing factor ATP-dependent RNA helicase DHX15                   |
| MCM3    | A0A0S2Z492_HUMAN | 126 | 94633  | 11 (4)  | 0.15 | DNA helicase                                                                |
| MIER2   | A0A087WZA4_HUMAN | 34  | 22628  | 1 (1)   | 0.15 | Mesoderm induction early response protein 2 (Fragment)                      |
| MSN     | MOES_HUMAN       | 47  | 67892  | 6 (3)   | 0.15 | Moesin                                                                      |
| HF21A   | PF21A_HUMAN      | 165 | 75434  | 4 (3)   | 0.14 | PHD finger protein 21A                                                      |
| HNRNPR  | HNRPR_HUMAN      | 84  | 71184  | 5 (3)   | 0.14 | Heterogeneous nuclear ribonucleoprotein R                                   |
| ILF3    | A0A024R7C7_HUMAN | 76  | 95678  | 8 (4)   | 0.14 | Interleukin enhancer binding factor 3, 90kDa, isoform CRA_d                 |
| PHF21A  | PF21A_HUMAN      | 236 | 75434  | 6 (3)   | 0.14 | PHD finger protein 21A                                                      |
| GNE     | GLCNE_HUMAN      | 67  | 80193  | 10 (3)  | 0.13 | Bifunctional UDP-N-acetylglucosamine 2-epimerase/N-acetylmannosamine kinase |
| GPBP1L1 | GPBL1_HUMAN      | 61  | 52612  | 3 (2)   | 0.13 | Vasculin-like protein 1                                                     |
| HLX     | HLX_HUMAN        | 27  | 51043  | 6 (2)   | 0.13 | H2.0-like homeobox protein                                                  |
| KRT80   | K2C80_HUMAN      | 89  | 51007  | 5 (3)   | 0.13 | Keratin, type II cytoskeletal 80                                            |
| POLD3   | A0A024R5M8_HUMAN | 98  | 51653  | 5 (2)   | 0.13 | Polymerase (DNA-directed), delta 3, accessory subunit, isoform CRA_a        |
| HMMR    | HMMR_HUMAN       | 147 | 84448  | 10 (3)  | 0.12 | Hyaluronan mediated motility receptor                                       |
| TAB1    | TAB1_HUMAN       | 68  | 54895  | 4 (2)   | 0.12 | TGF-beta-activated kinase 1 and MAP3K7-binding protein 1                    |
| TARS    | SYTC_HUMAN       | 92  | 84294  | 12 (3)  | 0.12 | Threonine--tRNA ligase, cytoplasmic                                         |
| TBK1    | TBK1_HUMAN       | 90  | 84216  | 12 (3)  | 0.12 | Serine/threonine-protein kinase TBK1                                        |
| VCL     | A0A024QZN4_HUMAN | 76  | 117220 | 11 (4)  | 0.12 | Vinculin, isoform CRA_c                                                     |
| XP32    | XP32_HUMAN       | 40  | 28557  | 1 (1)   | 0.12 | Skin-specific protein 32                                                    |
| YWHAZ   | D0PNI1_HUMAN     | 62  | 27899  | 1 (1)   | 0.12 | Epididymis luminal protein 4                                                |
| AHNAK   | AHNK_HUMAN       | 421 | 629213 | 70 (21) | 0.11 | Neuroblast differentiation-associated protein AHNAK                         |
| DNAJC21 | DJC21_HUMAN      | 162 | 62445  | 5 (2)   | 0.11 | DnaJ homolog subfamily C member 21                                          |
| DYNC1H1 | DYHC1_HUMAN      | 276 | 534809 | 50 (18) | 0.11 | Cytoplasmic dynein 1 heavy chain 1                                          |
| EHD1    | A0A024R571_HUMAN | 33  | 61945  | 8 (2)   | 0.11 | EH domain-containing protein 1                                              |

|         |                  |     |        |        |      |                                                         |
|---------|------------------|-----|--------|--------|------|---------------------------------------------------------|
| ELAC2   | A0A0S2Z5M8_HUMAN | 41  | 93415  | 6 (3)  | 0.11 | ElaC homolog 2 (E. coli), isoform CRA_b (Fragment)      |
| HM13    | A0A075B6F6_HUMAN | 24  | 30314  | 1 (1)  | 0.11 | Minor histocompatibility antigen H13 (Fragment)         |
| ACAD9   | ACAD9_HUMAN      | 40  | 69344  | 5 (2)  | 0.1  | Acyl-CoA dehydrogenase family member 9, mitochondrial   |
| CCDC174 | A0A087WYA9_HUMAN | 50  | 33679  | 4 (1)  | 0.1  | Coiled-coil domain-containing protein 174               |
| CDC23   | CDC23_HUMAN      | 34  | 69588  | 5 (2)  | 0.1  | Cell division cycle protein 23 homolog                  |
| CDYL    | CDYL_HUMAN       | 56  | 66953  | 3 (2)  | 0.1  | Chromodomain Y-like protein                             |
| CHD3    | CHD3_HUMAN       | 164 | 227989 | 14 (7) | 0.1  | Chromodomain-helicase-DNA-binding protein 3             |
| COPA    | COPA_HUMAN       | 107 | 139797 | 10 (4) | 0.1  | Coatamer subunit alpha                                  |
| C2CD2L  | C2C2L_HUMAN      | 86  | 76590  | 5 (2)  | 0.09 | Phospholipid transfer protein C2CD2L                    |
| CAPRIN1 | CAPR1_HUMAN      | 96  | 78489  | 2 (2)  | 0.09 | Caprin-1                                                |
| CRTC2   | CRTC2_HUMAN      | 96  | 73484  | 5 (2)  | 0.09 | CREB-regulated transcription coactivator 2              |
| DENND4C | A0A0A0MRX3_HUMAN | 18  | 38395  | 2 (1)  | 0.09 | DENN domain-containing protein 4C (Fragment)            |
| LETM1   | LETM1_HUMAN      | 82  | 83986  | 7 (2)  | 0.08 | Mitochondrial proton/calcium exchanger protein          |
| MCCC1   | A0A0S2Z693_HUMAN | 56  | 80935  | 6 (2)  | 0.08 | Methylcrotonoyl-CoA carboxylase 1 isoform 1 (Fragment)  |
| MISP3   | A0A044PY82_HUMAN | 36  | 39152  | 2 (1)  | 0.08 | Uncharacterized protein MISP3                           |
| MRE11   | F8W7U8_HUMAN     | 59  | 80814  | 7 (2)  | 0.08 | Double-strand break repair protein MRE11                |
| NCKIPSD | SPN90_HUMAN      | 53  | 79651  | 4 (2)  | 0.08 | NCK-interacting protein with SH3 domain                 |
| ENO1    | A0A024R4F1_HUMAN | 30  | 47481  | 2 (1)  | 0.07 | Enolase 1, (Alpha), isoform CRA_a                       |
| EXOSC9  | A5PLM5_HUMAN     | 27  | 49515  | 3 (1)  | 0.07 | Exosome component 9                                     |
| HRNR    | HORN_HUMAN       | 171 | 283140 | 12 (6) | 0.07 | Hornerin                                                |
| LAMP1   | A0A024RDY3_HUMAN | 49  | 45367  | 1 (1)  | 0.07 | Lysosomal-associated membrane protein 1, isoform CRA_a  |
| CDADC1  | CDAC1_HUMAN      | 22  | 59330  | 5 (1)  | 0.06 | Cytidine and dCMP deaminase domain-containing protein 1 |
| CDR2    | CDR2_HUMAN       | 63  | 52165  | 3 (1)  | 0.06 | Cerebellar degeneration-related protein 2               |
| CNOT2   | F8VV52_HUMAN     | 29  | 58754  | 4 (1)  | 0.06 | CCR4-NOT transcription complex subunit 2 (Fragment)     |
| DCTN4   | A0A0S2Z5B8_HUMAN | 32  | 51343  | 2 (1)  | 0.06 | Dynactin 4 isoform 2 (Fragment)                         |
| EED     | EED_HUMAN        | 41  | 50907  | 1 (1)  | 0.06 | Polycomb protein EED                                    |

|          |                  |    |        |        |      |                                                                   |
|----------|------------------|----|--------|--------|------|-------------------------------------------------------------------|
| EXOC2    | A0A024QZT2_HUMAN | 65 | 105084 | 6 (2)  | 0.06 | Exocyst complex component 2, isoform CRA_a                        |
| BMP2K    | BMP2K_HUMAN      | 44 | 129947 | 5 (2)  | 0.05 | BMP-2-inducible protein kinase                                    |
| CDC73    | CDC73_HUMAN      | 21 | 60653  | 7 (1)  | 0.05 | Parafibromin                                                      |
| CDK5RAP1 | A0A0S2Z5J9_HUMAN | 60 | 66959  | 3 (1)  | 0.05 | CDK5 regulatory subunit associated protein 1 isoform 2 (Fragment) |
| CHAF1B   | CAF1B_HUMAN      | 34 | 61910  | 1 (1)  | 0.05 | Chromatin assembly factor 1 subunit B                             |
| EIF3S9   | A0A024R821_HUMAN | 59 | 92823  | 4 (1)  | 0.04 | Eukaryotic translation initiation factor 3 subunit B              |
| ELOA     | A0A024RAC6_HUMAN | 46 | 87575  | 2 (1)  | 0.04 | Elongin-A                                                         |
| ACTN4    | A0A0S2Z3G9_HUMAN | 62 | 105245 | 1 (1)  | 0.03 | Actinin alpha 4 isoform 1 (Fragment)                              |
| AHNAK2   | AHNAK2_HUMAN     | 97 | 617383 | 21 (5) | 0.03 | Protein AHNAK2                                                    |
| ARHGEF2  | D3DVA5_HUMAN     | 38 | 116954 | 4 (1)  | 0.03 | Rho/rac guanine nucleotide exchange factor (GEF) 2, isoform CRA_a |
| ATP2A3   | AT2A3_HUMAN      | 82 | 115444 | 6 (1)  | 0.03 | Sarcoplasmic/endoplasmic reticulum calcium ATPase 3               |
| HDAC7    | HDAC7_HUMAN      | 90 | 103604 | 5 (1)  | 0.03 | Histone deacetylase 7                                             |
| HSPG2    | A0A024RAB6_HUMAN | 68 | 474443 | 11 (3) | 0.02 | Heparan sulfate proteoglycan 2 (Perlecan), isoform CRA_b          |
| INF2     | INF2_HUMAN       | 39 | 136851 | 5 (1)  | 0.02 | Inverted formin-2                                                 |
| JMJD1C   | JHD2C_HUMAN      | 90 | 286401 | 13 (2) | 0.02 | Probable JmjC domain-containing histone demethylation protein 2C  |
| LARS     | SYLC_HUMAN       | 26 | 135577 | 4 (1)  | 0.02 | Leucine--tRNA ligase, cytoplasmic                                 |
| LTBP1    | LTBP1_HUMAN      | 49 | 195112 | 1 (1)  | 0.02 | Latent-transforming growth factor beta-binding protein 1          |
| MKI67    | KI67_HUMAN       | 27 | 360698 | 18 (2) | 0.02 | Proliferation marker protein Ki-67                                |
| DMD      | A0A075B6G3_HUMAN | 54 | 428565 | 19 (1) | 0.01 | Dystrophin                                                        |
| DNAJC13  | DJC13_HUMAN      | 32 | 256533 | 10 (1) | 0.01 | DnaJ homolog subfamily C member 13                                |
| EP300    | EP300_HUMAN      | 31 | 266898 | 6 (1)  | 0.01 | Histone acetyltransferase p300                                    |
| GOLGA4   | H0Y6I0_HUMAN     | 30 | 247368 | 13 (1) | 0.01 | Golgin subfamily A member 4 (Fragment)                            |
| HELZ2    | HELZ2_HUMAN      | 26 | 298286 | 3 (1)  | 0.01 | Helicase with zinc finger domain 2                                |
| LRBA     | LRBA_HUMAN       | 35 | 321586 | 3 (1)  | 0.01 | Lipopolysaccharide-responsive and beige-like anchor protein       |
| MAP4     | E7EVA0_HUMAN     | 44 | 246546 | 7 (1)  | 0.01 | Microtubule-associated protein                                    |
| TRIO     | TRIO_HUMAN       | 77 | 349762 | 13 (2) | 0.01 | Triple functional domain protein                                  |
| UTP20    | UTP20_HUMAN      | 31 | 320805 | 7 (1)  | 0.01 | Small subunit processome component 20 homolog                     |
